# Supplementary material for: Awareness and Knowledge of Colorectal Cancer Screening Among Medical Students at the University of Aleppo: A Cross-Sectional Study
Source: PubMed Central journal article supplement — Avicenna J Med. 2022 Jul 3;12(2):54–60. doi: 10.1055/s-0042-1748810 (PMC9272450; doi:10.1055/s-0042-1748810), 2022-07-03
Supplement: 10-1055-s-0042-1748810-s210078.pdf [file 10-1055-s-0042-1748810-s210078.pdf]

**Supplementary Table S1** Awareness of colorectal cancer and screening methods among clinical students by average score

|                                    | Low score % (n) | High score % (n) | p-Value |
|------------------------------------|-----------------|------------------|---------|
| Awareness of CRC                   | 100 (275)       | 100 (269)        | -       |
| Awareness of CRC screening methods | 94.5 (259)      | 95.1 (252)       | 0.76    |
| Awareness of screening definition  | 39.5 (107)      | 58.7 (155)       | < 0.001 |

**Supplementary Table S2** Knowledge of colorectal cancer among clinical students by average score

|                    | Low score % (n) | High score % (n) | p-Value |
|--------------------|-----------------|------------------|---------|
| Risk factors       |                 |                  |         |
| Nonmodifiable      | 21.3 (58)       | 27.7 (73)        | 0.08    |
| Modifiable         | 14.8 (40)       | 15.5 (41)        | 0.80    |
| Signs and symptoms | 66.7 (182)      | 74.6 (197)       | 0.04    |
| Protective factors | 9.9 (27)        | 19.1 (51)        | 0.002   |

**Supplementary Table S3** Knowledge of colorectal cancer screening methods among clinical students by average score

|                                                  | Low score % (n) | High score % (n) | p-Value |
|--------------------------------------------------|-----------------|------------------|---------|
| CRC screening decreases the incidence of CRC     | 62.0 (170)      | 48.3 (130)       | <0.001  |
| CRC screening decreases the mortality of CRC     | 90.9 (249)      | 90.7 (244)       | 0.68    |
| CRC is a preventable disease                     | 62.9 (173)      | 69.4 (184)       | 0.15    |
| Knowledge of appropriate age to begin screening* | 68.0 (187)      | 63.3 (171)       | 0.25    |
| Screening methods                                |                 |                  |         |
| Fecal occult blood test                          | 87.9 (240)      | 88.9 (239)       | 0.88    |
| CT colonography                                  | 67.5 (181)      | 49.2 (130)       | < 0.001 |
| Colonoscopy                                      | 95.3 (261)      | 89.1 (237)       | 0.002   |
| Flexible sigmoidoscopy                           | 90.1 (246)      | 86.6 (232)       | 0.002   |

\*In average-risk population.
